# Supplementary material for: Up-regulation of IRF-3 expression through GATA-1 acetylation by histone deacetylase inhibitor in lung adenocarcinoma A549 cells
Source: PubMed Central journal article supplement (PMC5652676; doi:10.18632/oncotarget.18371), 2017-06-06
Supplement: oncotarget-08-75943-s001.pdf [file oncotarget-08-75943-s001.pdf]

## Up-regulation of IRF-3 expression through GATA-1 acetylation by histone deacetylase inhibitor in lung adenocarcinoma A549 cells

### SUPPLEMENTARY FIGURES

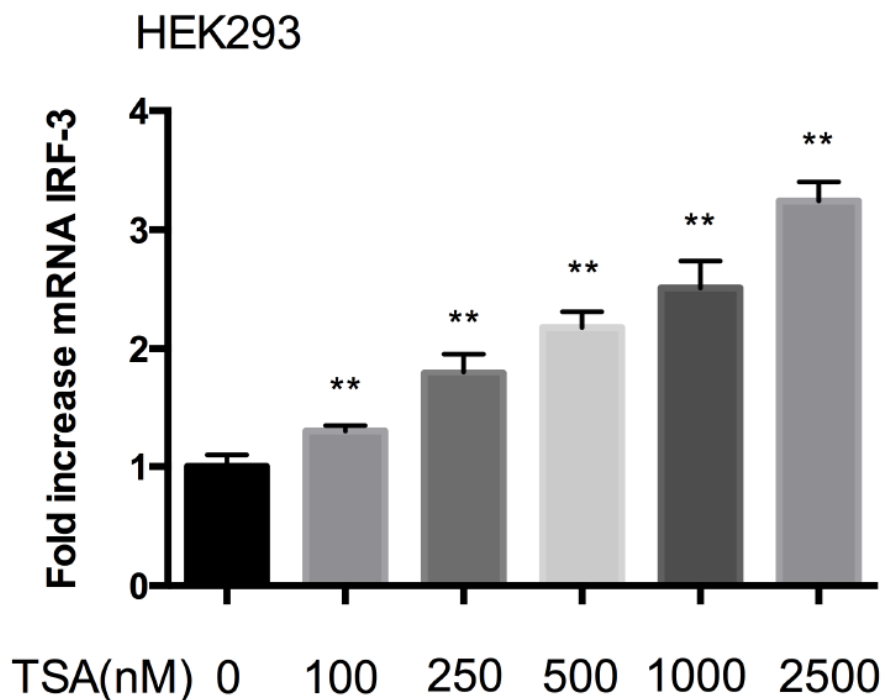

**Supplementary Figure 1: IRF-3 mRNA expression in TSA treated HEK293 cells.** The IRF-3 mRNA expression was examined in HEK293 cells after different dose of TSA treatment for 24 h. Bar represents the mean  $\pm$  S.D. from three independent experiments (\*\* $p < 0.01$ ).

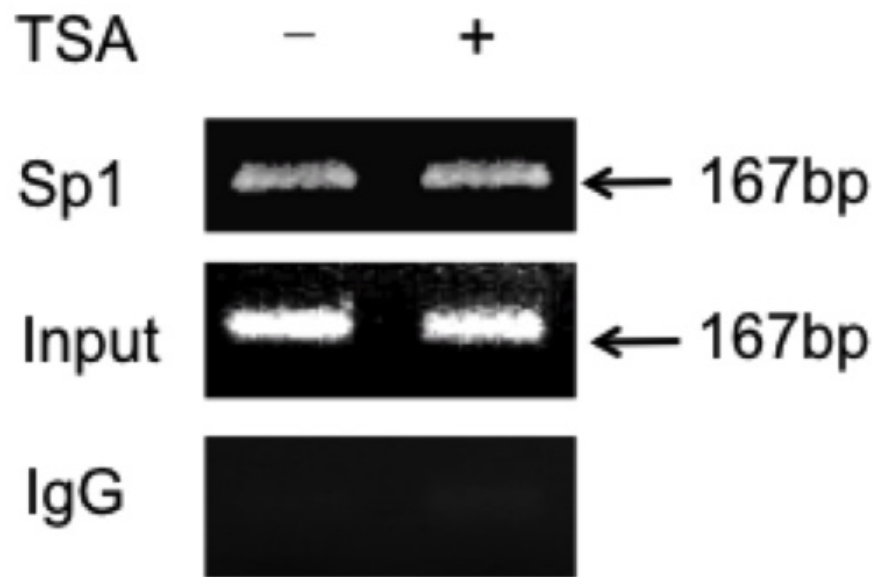

**Supplementary Figure 2: ChIP assays showed Sp1 binding affinity to IRF-3 promoter (nt -149 to +18) with or without the TSA treatment.** PCR products were detected by agarose gel electrophoresis.
